# Supplementary material
Source: PubMed Central journal article supplement (PMC8147662)
Supplement: NIHMS1699865-supplement-Suppl_Materiala.pdf [file NIHMS1699865-supplement-Suppl_Materiala.pdf]

## **APPENDIX TEXT**

### **Confirmatory Factor Modeling**

Previous studies have presented analyses on racism using a variety of geographic units, including nations,<sup>1</sup> states,<sup>2</sup> and counties.<sup>3</sup> This paper focuses on counties for several reasons. Some candidate indicators (comparison of segregation across schools, for example) necessitate a unit of analysis larger than census tract or neighborhood. However, there is little doubt that policies implemented by governmental units below the state level are important drivers of racial inequity. For example, school systems are often operated by county governments, which set educational policies that can encourage, or prohibit, school segregation. The close relationship<sup>4</sup> between school segregation and residential segregation reflects the appropriateness of a county level analysis. Finally, creating a measure based on a sub-county unit of analysis would exclude areas of the U.S. in which the county represents the smallest unit of government. A measure based on metropolitan statistical area would have excluded large portions of the U.S. population and restricted the analysis to urban areas, both of which would have represented significant limitations.

BMI was ascertained using Behavioral Risk Factor Surveillance System data from 2011 and 2012. It was expected that county structural racism would exhibit a lagged effect on BMI. There is little guidance in the literature on how much time might elapse between exposure to structural racism and BMI changes. Results reported by Franco et al<sup>5</sup> suggest BMI changes in response to large-scale social dynamics are rapid. In Cuba, the advent of the 1991 economic crisis coincided with a downward shift in mean population BMI that occurred over 3 years. Because BMI measurements are reported in 3-year intervals, it is uncertain whether this shift occurred more

**Appendix**  
**Measuring Structural Racism and Its Association With BMI**  
**Dougherty et al.**

quickly. However, modeled estimates of diabetes prevalence suggest a rapid shift over a single year or less. It is likely that CSR does not affect BMI with the same rapidity as a wholesale economic downturn of the type seen in Cuba, because the effects of CSR are not as proximal to the ability to purchase food as an immediate change in one's income. In light of this, the 2007–2011 American Community Survey 5-year data file was used, which provided a lag of 2.5 years. A similar vintage for other files was selected. Some files, such as the U.S. Department of Justice Census of Jails, were not available for 2009. In those instances, the available vintage closest to 2009 was used.

When the data permitted calculations using counts of non-Hispanic whites and non-Hispanic blacks, those categories were used. In some instances, the count of non-Hispanic blacks was unavailable. In those cases, the count of all blacks was used. Counties with black population of less than 500 were excluded.

Regarding development of indicators for the health care domain, the issue of reverse causation constrained the available choices. Evaluating indicators that are either in the causal pathway between structural racism and BMI, caused by BMI, or are otherwise associated directly with BMI, this could give rise to spurious association between structural racism and BMI. Thus, indicators more closely tied to access to care instead of indicators of health outcomes or health status were sought.

CSR was estimated with confirmatory factor analysis (CFA). This approach leverages common, rather than total, variability across available indicators in a summary factor and thus minimizes

the effect of random measurement error. CFA empirically determines the degree to which each indicator is weighted in the composite estimate. Unidimensional factor models, all of which specified CSR as the sole latent variable of interest and contained at least one indicator from each domain, were evaluated. Rather than scaling models to an anchor item, we specified models such that the latent variable would have mean 0 and a standard deviation of 1, with larger values indicating higher structural racism. Models were fit using robust maximum likelihood estimation, which produces unbiased estimates when fit to data with missing and skewed indicators. Model fit was evaluated with the Tucker–Lewis index, the confirmatory fit index, the root mean square error of approximation, and the standardized root mean square residual.

Table 1 describes candidate variables, along with those included in the final model. The approach to processing and modeling indicators was as follows:

1. Orient candidate indicators such that larger values indicate higher CSR.
2. Transform indicators when appropriate to reduce skew by taking the square root or natural log, or winsorizing at the 1st and 99th percentiles.
3. Remove candidate indicators that are unlikely to function well in CFA modeling (e.g., high proportion of missing data, minimal correlation with all other indicators, indicators that are functions of another indicator).
4. Develop a list of candidate CFA models including all possible indicator combinations that would yield a CFA with at least one indicator per domain.
5. Fit candidate CFA models to a derivation sample of data and extract fit statistics.
6. Identify feasible models: Acceptable fit statistics<sup>6</sup>,  $\geq 1$  indicator per domain, absence of diagnostics indicating Heywood case (standardized loading  $> 1$ ,

**Appendix**  
**Measuring Structural Racism and Its Association With BMI**  
**Dougherty et al.**

nonconvergence).

7. Select final model that provides optimal combination of a higher number of indicators and larger indicator loadings.
8. Fit final model to validation sample of data, evaluate results, and fit model to full dataset.

Most items removed after the initial assessment (Step 3 above) were poorly correlated with other candidate indicators. A further explanation of the model selection process is provided in Dougherty and Dean (2017)<sup>7</sup>. The final model exhibited acceptable fit statistics, with a confirmatory fit index of 0.97, a Tucker–Lewis fit index of 0.95, root mean square error of approximation of 0.04 and standardized root mean square residual of 0.05. The final model included the H (entropy) index; white/black high school graduation ratio, school dissimilarity index, the black/white poverty ratio; the black/white incarceration ratio; a ratio of white to black access to primary care, and a ratio of black to white inpatient hospital admission for ambulatory care sensitive conditions. All loadings were statistically significant.

## **APPENDIX REFERENCES**

1. Bécaries L, Nazroo J, Jackson J, Heuvelman H. Ethnic density effects on health and experienced racism among Caribbean people in the U.S. and England: a cross-national comparison. *Soc Sci Med*. 2012;75(12):2107–2115.  
<https://doi.org/10.1016/j.socscimed.2012.03.046>.
2. Krieger N, Chen JT, Coull B, Waterman PD, Beckfield J. The unique impact of abolition of Jim Crow laws on reducing inequities in infant death rates and implications for choice of comparison groups in analyzing societal determinants of health. *Am J Public Health*. 2013;103(12):2234–2244. <https://doi.org/10.2105/ajph.2013.301350>.
3. Bell CN, Kerr J, Young JL. Associations between obesity, obesogenic environments, and structural racism vary by county-level racial composition. *Int J Environ Res Public Health*. 2019;16(5):861. <https://doi.org/10.3390/ijerph16050861>.
4. Denton NA. The persistence of segregation: links between residential segregation and school segregation. *Minn Law Rev*. 1996;80:795–824.
5. Franco M, Bilal U, Ordunez P, et al. Population-wide weight loss and regain in relation to diabetes burden and cardiovascular mortality in Cuba 1980–2010: repeated cross sectional surveys and ecological comparison of secular trends. *BMJ*. 2013;346:f1515. <https://doi.org/10.1136/bmj.f1515>.
6. Hu L, Bentler PM. Cutoff criteria for fit indexes in covariance structure analysis: conventional criteria versus new alternatives. *Struct Equ Modeling*. 1999;6(1):1–55.  
<https://doi.org/10.1080/10705519909540118>.
7. Dougherty G, Dean L. Using theory to define a computationally tractable

**Appendix**  
**Measuring Structural Racism and Its Association With BMI**  
**Dougherty et al.**

specification space in confirmatory factor modeling. Stata Users Group.

<https://ideas.repec.org/p/boc/scon17/16.html>. Published 2017. Accessed December 27, 2019.

8. Reardon SF, Townsend JB. SEG: Stata module to compute multiple-group diversity and segregation indices.

<https://EconPapers.repec.org/RePEc:boc:bocode:s375001>. Published April 2018.

Accessed January 22, 2020.

9. Reardon SF, O’Sullivan D. Measures of spatial segregation. *Sociol Methodol*.

2004;34(1):121–162. <https://doi.org/10.1111/j.0081-1750.2004.00150.x>.

**Appendix**  
**Measuring Structural Racism and Its Association With BMI**  
**Dougherty et al.**

**Appendix Table 1.** Candidate Indicator Data Sources and Dispositions

| <b>Domain</b>    | <b>Indicator</b>             | <b>Transformation</b> | <b>Data custodian</b>        | <b>Database</b>                                                       | <b>Description</b>                                                                                             | <b>Status</b>               |
|------------------|------------------------------|-----------------------|------------------------------|-----------------------------------------------------------------------|----------------------------------------------------------------------------------------------------------------|-----------------------------|
| Criminal justice | Jail staff ratio             | Square root           | U.S. Department of Justice   | Census of Jail Facilities, 2006                                       | Ratio of non-Hispanic white to non-Hispanic black proportions of county residents employed as sworn jail staff | Dropped, initial assessment |
| Criminal justice | Jail incarceration ratio     | —                     | U.S. Department of Justice   | Census of Jail Inmates, 2005                                          | Ratio of non-Hispanic black to non-Hispanic white county jail incarceration                                    | Included in final model     |
| Criminal justice | Jail incarceration ratio     | —                     | U.S. Census Bureau           | Decennial Census, 2000                                                | Ratio of black to white county jail incarceration                                                              | Dropped, initial assessment |
| Criminal justice | Police staff ratio           | —                     | U.S. Department of Justice   | Law Enforcement Management and Administrative Statistics, 2007        | Ratio of non-Hispanic white to non-Hispanic black proportions of county residents employed as police officers  | Dropped, initial assessment |
| Education        | High school graduation ratio | —                     | U.S. Department of Education | Adjusted four-year cohort graduation rates public use file, 2010–2011 | Ratio of non-Hispanic white to non-Hispanic black high school graduation rates                                 | Included in final model     |
| Education        | College graduation ratio     | 1/square root         | U.S. Census Bureau           | American Community Survey SF-1 (2007–2011)                            | Ratio of non-Hispanic white to black college degree prevalence                                                 | Dropped, initial assessment |
| Education        | School dissimilarity index   | —                     | U.S. Department of Education | Common Core of Data (2007–2008)                                       | Calculated as described in Reardon and Townsend <sup>8</sup>                                                   | Included in final model     |
| Education        | School                       | —                     | U.S.                         | Common Core of                                                        | Calculated as described in                                                                                     | Dropped, initial            |

**Appendix**  
**Measuring Structural Racism and Its Association With BMI**  
**Dougherty et al.**

|             |                         |                   |                                            |                                      |                                                                          |                             |
|-------------|-------------------------|-------------------|--------------------------------------------|--------------------------------------|--------------------------------------------------------------------------|-----------------------------|
|             | diversity index         |                   | Department of Education                    | Data (2007–2008)                     | Reardon and Townsend <sup>8</sup>                                        | assessment                  |
| Education   | Thiel’s H index         | Natural logarithm | U.S. Department of Education               | Common Core of Data (2007–2008)      | Calculated as described in Reardon and Townsend <sup>8</sup>             | Dropped in CFA assessment   |
| Education   | School Simpson Index    | —                 | U.S. Department of Education               | Common Core of Data (2007–2008)      | Calculated as described in Reardon and Townsend <sup>8</sup>             | Dropped in CFA assessment   |
| Education   | School isolation index  | —                 | U.S. Department of Education               | Common Core of Data (2007–2008)      | Calculated as described in Reardon and Townsend <sup>8</sup>             | Dropped, initial assessment |
| Employment  | Per capita income ratio | Natural logarithm | U.S. Census Bureau                         | American Community Survey, 2007–2011 | Ratio of non-Hispanic white to non-Hispanic black per capita income      | Dropped, initial assessment |
| Employment  | Median income ratio     | Natural logarithm | U.S. Census Bureau                         | American Community Survey, 2007–2011 | Ratio of non-Hispanic white to non-Hispanic black median income          | Dropped, CFA assessment     |
| Employment  | Poverty ratio           | Square root       | U.S. Census Bureau                         | American Community Survey, 2007–2011 | Ratio of non-Hispanic black to non-Hispanic white poverty proportions    | Included in final model     |
| Employment  | Employment ratio        | 1/value cubed     | U.S. Census Bureau                         | American Community Survey, 2007–2011 | Ratio of non-Hispanic white to non-Hispanic black employment proportions | Dropped, CFA assessment     |
| Health care | Mortality ratio         | —                 | Centers for Disease Control and Prevention | Compressed Mortality File, 2007–2011 | Age-adjusted non-Hispanic black to non-Hispanic white mortality rate     | Dropped, CFA assessment     |



**Appendix**  
**Measuring Structural Racism and Its Association With BMI**  
**Dougherty et al.**

|             |                                            |                   |                                |                                      |                                                                                                                                                                    |                             |
|-------------|--------------------------------------------|-------------------|--------------------------------|--------------------------------------|--------------------------------------------------------------------------------------------------------------------------------------------------------------------|-----------------------------|
| Health care | A1c follow-up ratio                        |                   | Dartmouth Atlas of Health Care | 2012 Atlas                           | Ratio of annual proportion of white non-Hispanic to black non-Hispanic diabetic Medicare enrollees ages 65–75 years having hemoglobin A1c test                     | Dropped, initial assessment |
| Health care | Mammogram ratio                            |                   | Dartmouth Atlas of Health Care | 2012 Atlas                           | Ratio of proportion of white non-Hispanic to black non-Hispanic female Medicare enrollees aged 67–69 years having $\geq 1$ mammogram over a 2-year period          | Dropped, initial assessment |
| Health care | Insurance ratio                            | Natural logarithm | U.S. Census Bureau             | American Community Survey, 2008–2012 | Ratio of proportion of white non-Hispanic to black county residents with health insurance                                                                          | Dropped in CFA assessment   |
| Health care | Ambulatory care sensitive conditions ratio |                   | Dartmouth Atlas of Health Care | 2012 Atlas                           | Ratio of proportion of black non-Hispanic to white non-Hispanic Medicare beneficiaries discharged from a hospital for an ambulatory care sensitive condition       | Included in final model     |
| Health care | Primary care ratio                         |                   | Dartmouth Atlas of Health Care | 2012 Atlas                           | Ratio of average annual proportion of white non-Hispanic to black non-Hispanic Medicare enrollees having at least one ambulatory visit to a primary care clinician | Included in final model     |
| Housing     | Dissimilarity index, spatial               |                   | U.S. Census Bureau             | American Community Survey, 2007–2011 | Calculated as described in Reardon and O’Sullivan <sup>9</sup>                                                                                                     | Dropped, initial assessment |

**Appendix**  
**Measuring Structural Racism and Its Association With BMI**  
**Dougherty et al.**

|         |                               |                                                    |                                                     |                                                                                                                              |                             |
|---------|-------------------------------|----------------------------------------------------|-----------------------------------------------------|------------------------------------------------------------------------------------------------------------------------------|-----------------------------|
| Housing | Dissimilarity index, aspatial | U.S. Census Bureau                                 | American Community Survey, 2007–2011                | Calculated as described in Reardon and Townsend <sup>8</sup>                                                                 | Dropped, CFA assessment     |
| Housing | Diversity index               | U.S. Census Bureau                                 | American Community Survey, 2007–2011                | Calculated as described in Reardon and Townsend <sup>8</sup>                                                                 | Dropped, initial assessment |
| Housing | H (entropy) index             | U.S. Census Bureau                                 | American Community Survey, 2007–2011                | Calculated as described in Reardon and Townsend <sup>8</sup>                                                                 | Included in final model     |
| Housing | Index of Spatial Proximity    | U.S. Census Bureau                                 | American Community Survey Public Use Microdata 2007 | Mean intragroup proximity for majority and minority groups, weighted by the each group's percentage of the total population. | Dropped, initial assessment |
| Housing | Mortgage approval ratio       | Federal Financial Institutions Examination Council | Home Loan Disclosure Act, 2007                      | Percentage of white single-family home mortgage applications approved divided by black percentage approved                   | Dropped, initial assessment |
| Housing | Diversity index               | U.S. Census Bureau                                 | American Community Survey, 2007–2011                | Calculated as described in Reardon and Townsend <sup>8</sup>                                                                 | Dropped, initial assessment |
| Housing | Isolation index               | U.S. Census Bureau                                 | American Community Survey, 2007–2011                | Calculated as described in Reardon and Townsend <sup>8</sup>                                                                 | Dropped, initial assessment |

CFA, confirmatory factor analysis.

**Appendix**  
**Measuring Structural Racism and Its Association With BMI**  
**Dougherty et al.**

**Appendix Figure 1.** Data processing summary.

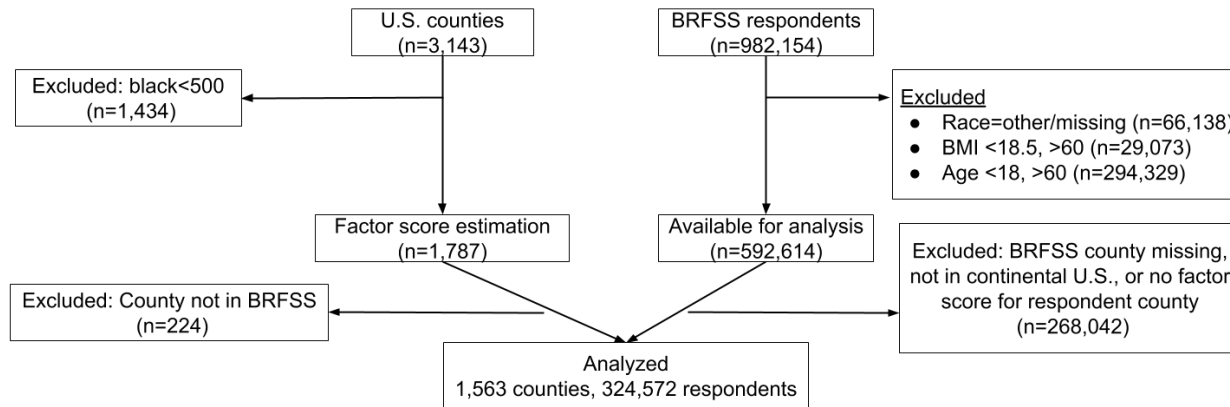

BRFSS, Behavioral Risk Factor Surveillance System.
